# Supplementary material for: Synthesis, antimicrobial activity and application of polymers of praseodymium complexes based on pyridine nitrogen oxide
Source: Royal Society of Chemistry journal article supplement (doi:10.1039/d4ra03003f), 2024-01-01
Supplement: d4ra03003f1.pdf [file d4ra03003f1.pdf]

## **Synthesis, antimicrobial activity and application in polymers of praseodymium complexes based on pyridine nitrogen oxide**

Qiuyin Zhu<sup>a, b, c, d</sup>, Wayne Hsu<sup>b, c, d</sup>, Shenglong Wang<sup>b, c, d</sup>, Fenglong Lin<sup>b, c, d</sup>, Yincai  
Wu<sup>b, c, d</sup>, Yimin Fang<sup>e</sup>, Jinglin Chen<sup>a\*</sup>, Lijun Song<sup>b, c, d\*</sup>

<sup>a</sup>JiangXi University of Science and Technology, Ganzhou, Jiangxi 341000, China

<sup>b</sup>Xiamen Institute of Rare Earth Materials, Chinese Academy of Sciences, Xiamen, Fujian 361021,  
China

<sup>c</sup>CAS Key Laboratory of Design and Assembly of Functional Nanostructures, and Fujian  
Provincial Key Laboratory of Nanomaterials, Fujian Institute of Research on the Structure of  
Matter, Chinese Academy of Sciences, Fuzhou, Fujian 350002, China

<sup>d</sup>Xiamen Key Laboratory of Rare Earth Photoelectric Functional Materials, Xiamen, Fujian  
361021, China

<sup>e</sup>Xiamen AXENT Co. Ltd., Xiamen, Fujian 361000, China

\*Corresponding author: L.J. Song. Tel./fax: +8618060944800. E-mail address: [slj@fjirsm.ac.cn](mailto:slj@fjirsm.ac.cn);

J.L. Chen. Tel./fax: +8615807077170. E-mail address: [gzchenjinglin@126.com](mailto:gzchenjinglin@126.com)

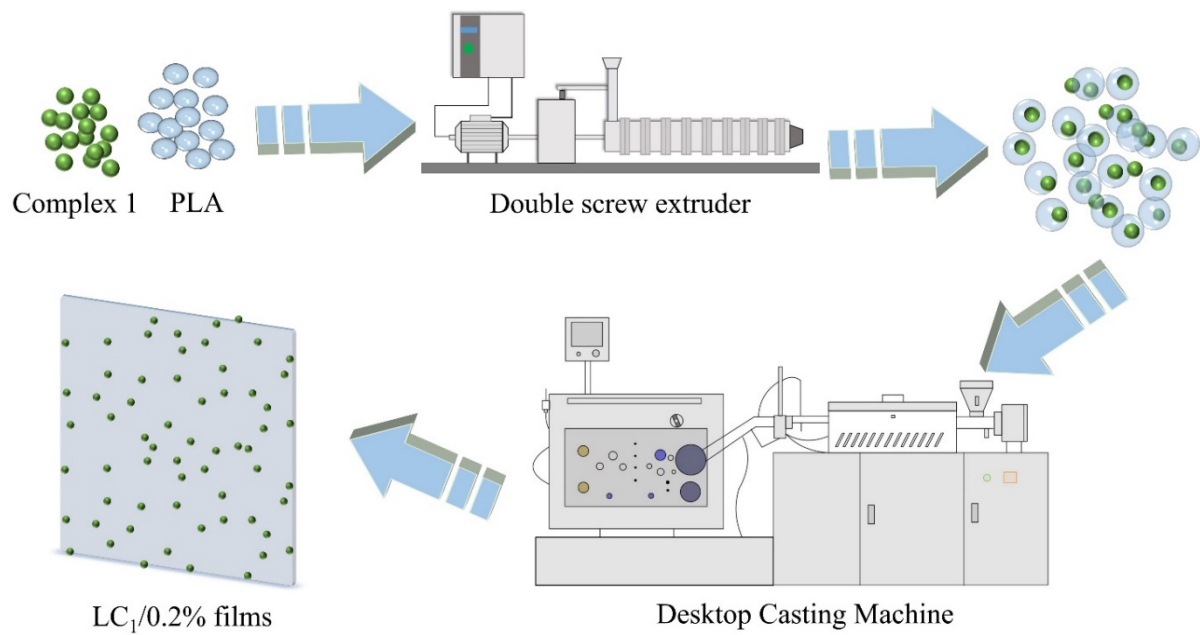

**Fig. S1.** Schematic illustration of the preparation of antibacterial plastic films.

**Table S1** Crystallographic data for the complexes **1** and **2**.

|                                      | <b>Complex 1</b>                                                                              | <b>Complex 2</b>                                                                              |
|--------------------------------------|-----------------------------------------------------------------------------------------------|-----------------------------------------------------------------------------------------------|
| Formula                              | C <sub>30</sub> H <sub>40</sub> N <sub>6</sub> O <sub>14</sub> Pr <sub>2</sub> S <sub>6</sub> | C <sub>30</sub> H <sub>32</sub> N <sub>6</sub> O <sub>12</sub> Pr <sub>2</sub> S <sub>4</sub> |
| Formula weight                       | 1182.86                                                                                       | 1078.701                                                                                      |
| Crystal system                       | Triclinic                                                                                     | triclinic                                                                                     |
| Volume                               | 1080.09                                                                                       | 942.614                                                                                       |
| Wavelength                           | 0.71073                                                                                       | 0.71073                                                                                       |
| Space group                          | $P\bar{1}$                                                                                    | P1                                                                                            |
| a, nm                                | 0.84728(5)                                                                                    | 0.65405(4)                                                                                    |
| b, nm                                | 0.97873(5)                                                                                    | 1.09927(6)                                                                                    |
| c, nm                                | 1.37277(8)                                                                                    | 1.44650(8)                                                                                    |
| $\alpha$ , deg                       | 92.265(2)                                                                                     | 68.977(2)                                                                                     |
| $\beta$ , deg                        | 107.891(2)                                                                                    | 81.458(2)                                                                                     |
| $\gamma$ , deg                       | 92.928(2)                                                                                     | 76.809(2)                                                                                     |
| Z                                    | 1                                                                                             | 1                                                                                             |
| $\rho_{\text{calc}}/\text{cm}^3$     | 1.819                                                                                         | 1.900                                                                                         |
| $\mu/\text{mm}^{-1}$                 | 2.586                                                                                         | 2.843                                                                                         |
| Goodness-of-fit on F <sup>2</sup>    | 1.078                                                                                         | 1.068                                                                                         |
| Final R indices [ $I > 2\sigma(I)$ ] | R <sub>1</sub> =0.0371, wR <sub>2</sub> =0.0939                                               | R <sub>1</sub> =0.0321, wR <sub>2</sub> =0.0627                                               |
| Final R indexes [all data]           | R <sub>1</sub> =0.0371, wR <sub>2</sub> =0.0939                                               | R <sub>1</sub> =0.0439, wR <sub>2</sub> =0.0704                                               |

**Table S2** Bond Lengths for Complex 1.

| <b>Atom</b> | <b>Atom</b>     | <b>Length/Å</b> | <b>Atom</b> | <b>Atom</b> | <b>Length/Å</b> |
|-------------|-----------------|-----------------|-------------|-------------|-----------------|
| Pr1         | S3              | 2.9399(8)       | O1          | N1          | 1.343(3)        |
| Pr1         | S2              | 3.0009(8)       | N2          | C10         | 1.366(4)        |
| Pr1         | S1              | 2.9247(8)       | N2          | C6          | 1.353(4)        |
| Pr1         | O3              | 2.382(2)        | C12         | C13         | 1.370(5)        |
| Pr1         | O4              | 2.479(2)        | N1          | C5          | 1.366(4)        |
| Pr1         | O2              | 2.490(2)        | N1          | C1          | 1.352(4)        |
| Pr1         | O2 <sup>1</sup> | 2.535(2)        | C14         | C15         | 1.368(5)        |
| Pr1         | O1              | 2.364(2)        | C14         | C13         | 1.397(5)        |
| S3          | C11             | 1.728(3)        | C10         | C9          | 1.412(5)        |
| S2          | C10             | 1.728(4)        | C8          | C9          | 1.366(7)        |
| S1          | C5              | 1.709(3)        | C8          | C7          | 1.383(7)        |
| O3          | N3              | 1.353(3)        | C6          | C7          | 1.375(5)        |
| O2          | N2              | 1.354(3)        | C5          | C4          | 1.419(4)        |
| N3          | C11             | 1.342(4)        | C1          | C2          | 1.372(5)        |
| N3          | C15             | 1.362(4)        | C4          | C3          | 1.366(6)        |
| C11         | C12             | 1.418(4)        | C2          | C3          | 1.400(6)        |

**Table S3** Angles for Complex 1.

| Atom            | Atom | Atom             | Angle/°    | Atom | Atom | Atom             | Angle/°    |
|-----------------|------|------------------|------------|------|------|------------------|------------|
| S3              | Pr1  | S2               | 79.42(2)   | N2   | O2   | Pr1 <sup>1</sup> | 122.64(16) |
| S1              | Pr1  | S3               | 76.32(2)   | N2   | O2   | Pr1              | 114.43(16) |
| S1              | Pr1  | S2               | 91.46(3)   | O3   | N3   | C15              | 116.2(3)   |
| O3              | Pr1  | S3               | 65.45(5)   | C11  | N3   | O3               | 120.0(2)   |
| O3              | Pr1  | S2               | 144.40(5)  | C11  | N3   | C15              | 123.8(3)   |
| O3              | Pr1  | S1               | 85.94(6)   | N3   | C11  | S3               | 120.6(2)   |
| O3              | Pr1  | O4               | 71.73(8)   | N3   | C11  | C12              | 116.5(3)   |
| O3              | Pr1  | O2               | 137.83(7)  | C12  | C11  | S3               | 122.9(3)   |
| O3              | Pr1  | O2 <sup>1</sup>  | 82.31(7)   | N1   | O1   | Pr1              | 132.44(18) |
| O4              | Pr1  | S3               | 136.24(6)  | O2   | N2   | C10              | 118.7(3)   |
| O4              | Pr1  | S2               | 140.97(6)  | C6   | N2   | O2               | 117.5(3)   |
| O4              | Pr1  | S1               | 109.82(6)  | C6   | N2   | C10              | 123.7(3)   |
| O4              | Pr1  | O2 <sup>1</sup>  | 81.07(7)   | C13  | C12  | C11              | 120.8(3)   |
| O4              | Pr1  | O2               | 79.00(7)   | O1   | N1   | C5               | 119.8(3)   |
| O2              | Pr1  | S3               | 129.42(5)  | O1   | N1   | C1               | 116.5(3)   |
| O2 <sup>1</sup> | Pr1  | S3               | 84.73(5)   | C1   | N1   | C5               | 123.6(3)   |
| O2              | Pr1  | S2               | 63.00(5)   | C15  | C14  | C13              | 118.4(3)   |
| O2 <sup>1</sup> | Pr1  | S2               | 89.17(5)   | N3   | C15  | C14              | 120.3(3)   |
| O2 <sup>1</sup> | Pr1  | S1               | 160.58(5)  | N2   | C10  | S2               | 120.0(2)   |
| O2              | Pr1  | S1               | 133.23(5)  | N2   | C10  | C9               | 115.4(3)   |
| O2              | Pr1  | O2 <sup>1</sup>  | 63.39(8)   | C9   | C10  | S2               | 124.6(3)   |
| O1              | Pr1  | S3               | 138.04(6)  | C12  | C13  | C14              | 120.2(3)   |
| O1              | Pr1  | S2               | 85.34(6)   | C9   | C8   | C7               | 119.6(3)   |
| O1              | Pr1  | S1               | 65.17(6)   | C8   | C9   | C10              | 121.9(4)   |
| O1              | Pr1  | O3               | 124.65(8)  | N2   | C6   | C7               | 119.7(4)   |
| O1              | Pr1  | O4               | 75.37(8)   | C6   | C7   | C8               | 119.2(4)   |
| O1              | Pr1  | O2               | 73.78(7)   | N1   | C5   | S1               | 119.2(2)   |
| O1              | Pr1  | O2 <sup>1</sup>  | 134.19(7)  | N1   | C5   | C4               | 115.7(3)   |
| C11             | S3   | Pr1              | 100.48(11) | C4   | C5   | S1               | 125.1(3)   |
| C10             | S2   | Pr1              | 93.25(11)  | N1   | C1   | C2               | 120.6(3)   |
| C5              | S1   | Pr1              | 101.82(11) | C3   | C4   | C5               | 121.7(3)   |
| N3              | O3   | Pr1              | 131.53(17) | C1   | C2   | C3               | 118.5(3)   |
| Pr1             | O2   | Pr1 <sup>1</sup> | 116.61(8)  | C4   | C3   | C2               | 119.9(3)   |

**Table S4** Torsion Angles for Complex 1.

| <b>A</b>         | <b>B</b> | <b>C</b> | <b>D</b> | <b>Angle/°</b> | <b>A</b> | <b>B</b> | <b>C</b> | <b>D</b> | <b>Angle/°</b> |
|------------------|----------|----------|----------|----------------|----------|----------|----------|----------|----------------|
| Pr1              | S3       | C11      | N3       | 8.9(3)         | C11      | N3       | C15      | C14      | 0.6(5)         |
| Pr1              | S3       | C11      | C12      | -170.3(2)      | C11      | C12      | C13      | C14      | 0.8(5)         |
| Pr1              | S2       | C10      | N2       | 28.8(3)        | O1       | N1       | C5       | S1       | -1.7(4)        |
| Pr1              | S2       | C10      | C9       | -148.6(3)      | O1       | N1       | C5       | C4       | 179.5(3)       |
| Pr1              | S1       | C5       | N1       | -6.3(3)        | O1       | N1       | C1       | C2       | -179.7(3)      |
| Pr1              | S1       | C5       | C4       | 172.4(3)       | N2       | C10      | C9       | C8       | -4.6(5)        |
| Pr1              | O3       | N3       | C11      | -13.7(4)       | N2       | C6       | C7       | C8       | 0.0(5)         |
| Pr1              | O3       | N3       | C15      | 165.1(2)       | N1       | C5       | C4       | C3       | -0.5(5)        |
| Pr1 <sup>1</sup> | O2       | N2       | C10      | 97.7(3)        | N1       | C1       | C2       | C3       | 0.7(6)         |
| Pr1              | O2       | N2       | C10      | -53.4(3)       | C15      | N3       | C11      | S3       | -179.1(2)      |
| Pr1              | O2       | N2       | C6       | 124.4(2)       | C15      | N3       | C11      | C12      | 0.2(4)         |
| Pr1 <sup>1</sup> | O2       | N2       | C6       | -84.6(3)       | C15      | C14      | C13      | C12      | 0.0(5)         |
| Pr1              | O1       | N1       | C5       | 13.7(4)        | C10      | N2       | C6       | C7       | -5.5(5)        |
| Pr1              | O1       | N1       | C1       | -167.6(2)      | C13      | C14      | C15      | N3       | -0.7(5)        |
| S3               | C11      | C12      | C13      | 178.4(3)       | C9       | C8       | C7       | C6       | 2.8(6)         |
| S2               | C10      | C9       | C8       | 173.0(3)       | C6       | N2       | C10      | S2       | -170.0(2)      |
| S1               | C5       | C4       | C3       | -179.2(3)      | C6       | N2       | C10      | C9       | 7.6(5)         |
| O3               | N3       | C11      | S3       | -0.4(4)        | C7       | C8       | C9       | C10      | -0.4(6)        |
| O3               | N3       | C11      | C12      | 178.8(3)       | C5       | N1       | C1       | C2       | -1.1(5)        |
| O3               | N3       | C15      | C14      | -178.1(3)      | C5       | C4       | C3       | C2       | 0.2(6)         |
| O2               | N2       | C10      | S2       | 7.6(4)         | C1       | N1       | C5       | S1       | 179.7(3)       |
| O2               | N2       | C10      | C9       | -174.8(3)      | C1       | N1       | C5       | C4       | 0.9(5)         |
| O2               | N2       | C6       | C7       | 176.8(3)       | C1       | C2       | C3       | C4       | -0.3(6)        |
| N3               | C11      | C12      | C13      | -0.9(5)        |          |          |          |          |                |

**Table S5** Bond Lengths for Complex 2.

| Atom | Atom | Length/Å    | Atom | Atom | Length/Å   |
|------|------|-------------|------|------|------------|
| Pr1  | S1   | 2.94847(15) | N3   | C11  | 1.3905(4)  |
| Pr1  | S2   | 2.87964(15) | N3   | C15  | 1.3906(5)  |
| Pr1  | O1   | 2.4360(3)   | N4   | C16  | 1.3867(4)  |
| Pr1  | O1W  | 2.5461(4)   | N4   | C20  | 1.3191(7)  |
| Pr1  | O2   | 2.4770(4)   | N5   | C21  | 1.3808(5)  |
| Pr1  | O2W  | 2.4808(2)   | N5   | C25  | 1.3040(4)  |
| Pr1  | O3'  | 2.4510(3)   | N6   | C26  | 1.3915(4)  |
| Pr1  | O3   | 2.4055(3)   | N6   | C30  | 1.3913(4)  |
| Pr2  | S3   | 2.92877(15) | C1   | C2   | 1.4543(6)  |
| Pr2  | S4   | 2.92127(15) | C2   | C3   | 1.2550(5)  |
| Pr2  | O3W  | 2.5249(2)   | C3   | C4   | 1.5541(6)  |
| Pr2  | O4   | 2.4227(4)   | C4   | C5   | 1.3223(6)  |
| Pr2  | O4W  | 2.5703(4)   | C6   | C7   | 1.4101(10) |
| Pr2  | O5   | 2.3994(3)   | C7   | C8   | 1.3233(8)  |
| Pr2  | O6   | 2.5000(3)   | C8   | C9   | 1.4407(5)  |
| Pr2  | O6'  | 2.6688(3)   | C9   | C10  | 1.3523(10) |
| S1   | C1   | 1.6795(4)   | C11  | C12  | 1.3900(5)  |
| S2   | C6   | 1.7579(6)   | C12  | C13  | 1.3903(5)  |
| S3   | C16  | 1.6178(6)   | C13  | C14  | 1.3904(4)  |
| S4   | C21  | 1.7089(4)   | C14  | C15  | 1.3901(5)  |
| O1   | N1   | 1.3720(4)   | C16  | C17  | 1.4183(10) |
| O2   | N2   | 1.2871(7)   | C17  | C18  | 1.3956(7)  |
| O3'  | C11  | 1.3520(5)   | C18  | C19  | 1.2988(5)  |
| O3   | N3   | 1.3527(4)   | C19  | C20  | 1.3826(10) |
| O4   | N4   | 1.4040(7)   | C21  | C22  | 1.3759(6)  |
| O5   | N5   | 1.3151(4)   | C22  | C23  | 1.4703(5)  |
| O6   | N6   | 1.2965(4)   | C23  | C24  | 1.2020(5)  |
| O6'  | C26  | 1.3820(4)   | C24  | C25  | 1.3891(6)  |
| N1   | C1   | 1.3487(5)   | C26  | C27  | 1.3918(5)  |
| N1   | C5   | 1.4268(4)   | C27  | C28  | 1.3914(5)  |
| N2   | C6   | 1.3677(5)   | C28  | C29  | 1.3913(4)  |
| N2   | C10  | 1.3896(7)   | C29  | C30  | 1.3912(5)  |

**Table S6 Bond Angles for Complex 2.**

| Atom | Atom | Atom | Angle/°     | Atom | Atom | Atom | Angle/°     |
|------|------|------|-------------|------|------|------|-------------|
| S2   | Pr1  | S1   | 92.837(2)   | N4   | O4   | Pr2  | 130.950(15) |
| O1   | Pr1  | S1   | 65.473(6)   | N5   | O5   | Pr2  | 131.99(2)   |
| O1   | Pr1  | S2   | 135.293(9)  | N6   | O6   | Pr2  | 116.748(16) |
| O1W  | Pr1  | S1   | 87.682(6)   | C26  | O6'  | Pr2  | 105.974(19) |
| O1W  | Pr1  | S2   | 141.116(4)  | C1   | N1   | O1   | 122.17(3)   |
| O1W  | Pr1  | O1   | 79.486(10)  | C5   | N1   | O1   | 110.74(3)   |
| O2   | Pr1  | S1   | 96.660(6)   | C5   | N1   | C1   | 126.99(4)   |
| O2   | Pr1  | S2   | 64.753(6)   | C6   | N2   | O2   | 123.39(4)   |
| O2   | Pr1  | O1   | 78.871(11)  | C10  | N2   | O2   | 118.70(3)   |
| O2   | Pr1  | O1W  | 153.745(7)  | C10  | N2   | C6   | 117.29(5)   |
| O2W  | Pr1  | S1   | 72.020(6)   | C11  | N3   | O3   | 117.17(3)   |
| O2W  | Pr1  | S2   | 69.608(9)   | C15  | N3   | O3   | 119.70(2)   |
| O2W  | Pr1  | O1   | 130.051(9)  | C15  | N3   | C11  | 123.08(3)   |
| O2W  | Pr1  | O1W  | 73.681(10)  | C16  | N4   | O4   | 115.46(4)   |
| O2W  | Pr1  | O2   | 132.279(11) | C20  | N4   | O4   | 116.71(3)   |
| O3'  | Pr1  | S1   | 138.697(6)  | C20  | N4   | C16  | 127.17(6)   |
| O3'  | Pr1  | S2   | 121.085(9)  | C21  | N5   | O5   | 118.59(3)   |
| O3'  | Pr1  | O1   | 73.546(8)   | C25  | N5   | O5   | 123.91(3)   |
| O3'  | Pr1  | O1W  | 79.902(10)  | C25  | N5   | C21  | 117.29(4)   |
| O3'  | Pr1  | O2   | 79.854(11)  | C26  | N6   | O6   | 121.50(3)   |
| O3'  | Pr1  | O2W  | 138.482(9)  | C30  | N6   | O6   | 112.03(2)   |
| O3   | Pr1  | S1   | 151.057(6)  | C30  | N6   | C26  | 126.46(3)   |
| O3   | Pr1  | S2   | 83.693(9)   | N1   | C1   | S1   | 120.35(3)   |
| O3   | Pr1  | O1   | 133.865(9)  | C2   | C1   | S1   | 123.76(3)   |
| O3   | Pr1  | O1W  | 77.660(11)  | C2   | C1   | N1   | 115.82(3)   |
| O3   | Pr1  | O2   | 107.553(10) | C3   | C2   | C1   | 123.15(4)   |
| O3   | Pr1  | O2W  | 79.903(7)   | C4   | C3   | C2   | 117.63(4)   |
| O3   | Pr1  | O3'  | 63.344(7)   | C5   | C4   | C3   | 122.41(3)   |
| S4   | Pr2  | S3   | 92.625(2)   | C4   | C5   | N1   | 113.77(3)   |
| O3W  | Pr2  | S3   | 69.270(9)   | N2   | C6   | S2   | 115.75(5)   |
| O3W  | Pr2  | S4   | 72.174(6)   | C7   | C6   | S2   | 125.15(3)   |
| O4   | Pr2  | S3   | 65.450(7)   | C7   | C6   | N2   | 118.85(5)   |
| O4   | Pr2  | S4   | 94.623(6)   | C8   | C7   | C6   | 125.79(4)   |
| O4   | Pr2  | O3W  | 132.025(11) | C9   | C8   | C7   | 113.55(6)   |
| O4W  | Pr2  | S3   | 139.008(4)  | C10  | C9   | C8   | 122.14(5)   |
| O4W  | Pr2  | S4   | 87.381(6)   | C9   | C10  | N2   | 121.65(3)   |
| O4W  | Pr2  | O3W  | 71.811(10)  | N3   | C11  | O3'  | 113.62(3)   |
| O4W  | Pr2  | O4   | 155.436(8)  | C12  | C11  | O3'  | 129.35(3)   |



**Table S6** Bond Angles for Complex 2.

| Atom | Atom | Atom | Angle/°     | Atom | Atom | Atom | Angle/°   |
|------|------|------|-------------|------|------|------|-----------|
| O5   | Pr2  | S3   | 135.102(9)  | C12  | C11  | N3   | 116.86(3) |
| O5   | Pr2  | S4   | 65.219(6)   | C13  | C12  | C11  | 123.13(3) |
| O5   | Pr2  | O3W  | 130.086(9)  | C14  | C13  | C12  | 116.80(3) |
| O5   | Pr2  | O4   | 77.441(11)  | C15  | C14  | C13  | 123.15(4) |
| O5   | Pr2  | O4W  | 81.264(10)  | C14  | C15  | N3   | 116.83(3) |
| O6   | Pr2  | S3   | 121.019(9)  | N4   | C16  | S3   | 124.83(5) |
| O6   | Pr2  | S4   | 138.913(6)  | C17  | C16  | S3   | 122.45(3) |
| O6   | Pr2  | O3W  | 138.480(9)  | C17  | C16  | N4   | 112.42(5) |
| O6   | Pr2  | O4   | 80.809(11)  | C18  | C17  | C16  | 116.42(4) |
| O6   | Pr2  | O4W  | 81.675(10)  | C19  | C18  | C17  | 129.53(7) |
| O6   | Pr2  | O5   | 73.993(8)   | C20  | C19  | C18  | 113.04(5) |
| O6'  | Pr2  | S3   | 86.089(8)   | C19  | C20  | N4   | 120.79(4) |
| O6'  | Pr2  | S4   | 144.132(5)  | N5   | C21  | S4   | 120.75(3) |
| O6'  | Pr2  | O3W  | 73.918(7)   | C22  | C21  | S4   | 123.37(3) |
| O6'  | Pr2  | O4   | 116.925(10) | C22  | C21  | N5   | 115.74(3) |
| O6'  | Pr2  | O4W  | 71.140(10)  | C23  | C22  | C21  | 119.53(3) |
| O6'  | Pr2  | O5   | 134.950(10) | C24  | C23  | C22  | 123.72(4) |
| O6'  | Pr2  | O6   | 67.447(7)   | C25  | C24  | C23  | 114.00(3) |
| C1   | S1   | Pr1  | 101.779(15) | C24  | C25  | N5   | 129.09(4) |
| C6   | S2   | Pr1  | 104.521(18) | N6   | C26  | O6'  | 125.36(3) |
| C16  | S3   | Pr2  | 102.27(2)   | C27  | C26  | O6'  | 120.78(3) |
| C21  | S4   | Pr2  | 100.750(15) | C27  | C26  | N6   | 113.51(3) |
| N1   | O1   | Pr1  | 126.79(2)   | C28  | C27  | C26  | 126.42(3) |
| N2   | O2   | Pr1  | 129.922(16) | C29  | C28  | C27  | 113.57(3) |
| C11  | O3'  | Pr1  | 122.989(17) | C30  | C29  | C28  | 126.37(3) |
| N3   | O3   | Pr1  | 122.786(15) | C29  | C30  | N6   | 113.55(3) |

**Table S7** Torsion Angles for Complex 2.

| <b>A</b> | <b>B</b> | <b>C</b> | <b>D</b> | <b>Angle<sup>o</sup></b> | <b>A</b> | <b>B</b> | <b>C</b> | <b>D</b> | <b>Angle<sup>o</sup></b> |
|----------|----------|----------|----------|--------------------------|----------|----------|----------|----------|--------------------------|
| Pr1      | S1       | C1       | N1       | 8.51(3)                  | O3'      | C11      | N3       | C15      | -178.76(5)               |
| Pr1      | S1       | C1       | C2       | -168.44(4)               | O3'      | C11      | C12      | C13      | 174.94(7)                |
| Pr1      | O1       | N1       | C1       | -20.66(5)                | O3       | N3       | C11      | C12      | 174.51(6)                |
| Pr1      | O1       | N1       | C5       | 162.82(5)                | O3       | N3       | C15      | C14      | -174.66(6)               |
| Pr1      | O2       | N2       | C6       | 16.32(4)                 | O4       | N4       | C16      | C17      | 175.86(4)                |
| Pr1      | O2       | N2       | C10      | -172.98(3)               | O4       | N4       | C20      | C19      | -176.98(3)               |
| Pr1      | O3'      | C11      | N3       | 3.21(4)                  | O5       | N5       | C21      | C22      | 176.40(6)                |
| Pr1      | O3'      | C11      | C12      | -171.89(5)               | O5       | N5       | C25      | C24      | -176.15(6)               |
| Pr1      | O3       | N3       | C11      | -1.25(5)                 | O6       | N6       | C26      | O6'      | -8.04(6)                 |
| Pr1      | O3       | N3       | C15      | 176.36(4)                | O6       | N6       | C26      | C27      | 178.77(6)                |
| Pr2      | S3       | C16      | N4       | 11.69(2)                 | O6       | N6       | C30      | C29      | 179.14(5)                |
| Pr2      | S3       | C16      | C17      | -175.09(3)               | O6'      | C26      | N6       | C30      | 171.49(6)                |
| Pr2      | O4       | N4       | C16      | 1.44(3)                  | O6'      | C26      | C27      | C28      | -172.19(6)               |
| Pr2      | O4       | N4       | C20      | 172.75(3)                | N1       | C1       | C2       | C3       | 1.24(8)                  |
| Pr2      | O5       | N5       | C21      | 15.94(5)                 | N1       | C5       | C4       | C3       | -5.32(8)                 |
| Pr2      | O5       | N5       | C25      | -158.62(5)               | N2       | C6       | C7       | C8       | -7.95(6)                 |
| Pr2      | O6       | N6       | C26      | -8.16(5)                 | N2       | C10      | C9       | C8       | 6.14(5)                  |
| Pr2      | O6       | N6       | C30      | 172.24(4)                | N3       | C11      | C12      | C13      | -0.03(8)                 |
| Pr2      | O6'      | C26      | N6       | 17.33(4)                 | N3       | C15      | C14      | C13      | 0.46(8)                  |
| Pr2      | O6'      | C26      | C27      | -169.95(4)               | N4       | C16      | C17      | C18      | -4.88(5)                 |
| S1       | C1       | N1       | O1       | 4.41(7)                  | N4       | C20      | C19      | C18      | 6.82(5)                  |
| S1       | C1       | N1       | C5       | -179.66(5)               | N5       | C21      | C22      | C23      | 5.60(8)                  |
| S1       | C1       | C2       | C3       | 178.33(6)                | N5       | C25      | C24      | C23      | -5.20(9)                 |
| S2       | C6       | N2       | O2       | -6.12(4)                 | N6       | C26      | C27      | C28      | 1.35(8)                  |
| S2       | C6       | N2       | C10      | -176.95(3)               | N6       | C30      | C29      | C28      | 3.36(8)                  |
| S2       | C6       | C7       | C8       | 177.94(4)                | C1       | C2       | C3       | C4       | -2.11(9)                 |
| S3       | C16      | N4       | O4       | -10.33(5)                | C2       | C3       | C4       | C5       | 4.54(9)                  |
| S3       | C16      | N4       | C20      | 179.43(4)                | C6       | C7       | C8       | C9       | 5.60(6)                  |
| S3       | C16      | C17      | C18      | -178.87(4)               | C7       | C8       | C9       | C10      | -4.64(5)                 |
| S4       | C21      | N5       | O5       | 0.62(7)                  | C11      | C12      | C13      | C14      | 3.00(8)                  |
| S4       | C21      | N5       | C25      | 175.54(5)                | C12      | C13      | C14      | C15      | -3.22(8)                 |
| S4       | C21      | C22      | C23      | -178.76(6)               | C16      | C17      | C18      | C19      | 6.92(6)                  |
| O1       | N1       | C1       | C2       | -178.40(6)               | C17      | C18      | C19      | C20      | -7.47(6)                 |
| O1       | N1       | C5       | C4       | -179.07(5)               | C21      | C22      | C23      | C24      | -1.95(9)                 |
| O2       | N2       | C6       | C7       | 179.22(4)                | C22      | C23      | C24      | C25      | 1.17(9)                  |
| O2       | N2       | C10      | C9       | -179.20(4)               | C26      | C27      | C28      | C29      | 1.06(9)                  |
| O3'      | C11      | N3       | O3       | -1.24(7)                 | C27      | C28      | C29      | C30      | -3.64(8)                 |
